# Supplementary material
Source: publisher figshare collection journal article supplement (https://tandf.figshare.com/articles/dataset/_/11814720)
Supplement: Supplementary file 1 [file 1 › tbio_a_1720815_sm1646.pdf]

## Electronic Supplementary Material

### Distress Calls of Nectarivorous Bats (*Glossophaga soricina*) Encode Individual and Species Identity

David Hörmann, Marco Tschapka, Andreas Rose, Mirjam Knörnschild

#### Content

DFA signal space depicting six distress call syllable types (Figure S1)

Assessment of model fit for three discriminant function analyses (Table S1)

Reaction to Playbacks – Per-bat response in small captive groups

Hovering time in front of the speaker analysed through video recordings (Table S2)

Presumably active mobbing of a predator by *Glossophaga soricina* (Video S1)

Playback Set-Up (Figure S2)

**Figure S1**

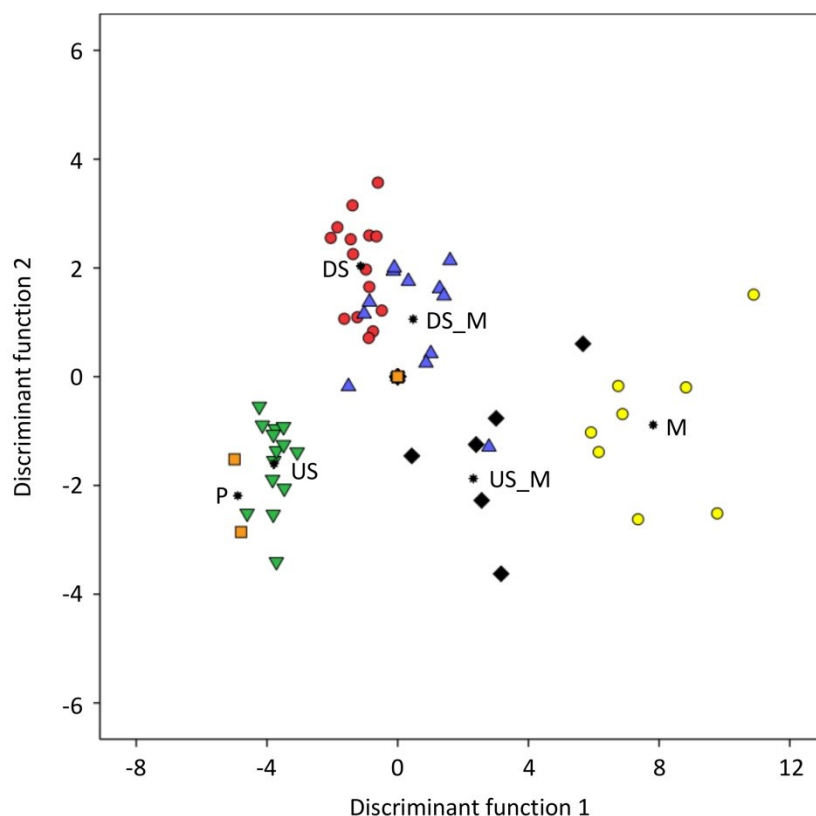

**Figure S1:** Signal space of a DFA depicting six distress call syllable types. The first two functions of a DFA define a signal space in which the location of each syllable type (centroid) is marked with a black star symbol. Other symbols with different shapes and colors refer to the averages for each individual and syllable type.

**Table S1:** Assessment of model fit for three discriminant function analyses.

| Analysis                                                                        | Function | Eigenvalue | % of variance | Cumulated variance [%] | Test of function | Wilk's $\lambda$ | $\chi^2$ | df  | p       |
|---------------------------------------------------------------------------------|----------|------------|---------------|------------------------|------------------|------------------|----------|-----|---------|
| DFA 1<br>(distress call syllable types)                                         | 1        | 15.713     | 81.8          | 81.8                   | 1 to 5           | 0.009            | 225.208  | 40  | <0.0001 |
|                                                                                 | 2        | 2.890      | 15.0          | 96.8                   | 2 to 5           | 0.153            | 90.032   | 28  | <0.0001 |
|                                                                                 | 3        | 0.493      | 2.6           | 99.4                   | 3 to 5           | 0.596            | 24.823   | 18  | 0.130   |
|                                                                                 | 4        | 0.114      | 0.6           | 100.0                  | 4 to 5           | 0.890            | 5.569    | 10  | 0.850   |
|                                                                                 | 5        | 0.008      | 0.0           | 100.0                  | 5                | 0.992            | 0.404    | 4   | 0.982   |
| DFA 2<br>(individual signature;<br>all 6 distress call syllables types)         | 1        | 1.182      | 53.0          | 53.0                   | 1 to 13          | 0.177            | 3311.054 | 182 | <0.0001 |
|                                                                                 | 2        | 0.332      | 14.9          | 67.9                   | 2 to 13          | 0.385            | 1820.973 | 156 | <0.0001 |
|                                                                                 | 3        | 0.240      | 10.8          | 78.7                   | 3 to 13          | 0.513            | 1273.244 | 132 | <0.0001 |
|                                                                                 | 4        | 0.172      | 7.7           | 86.4                   | 4 to 13          | 0.637            | 862.491  | 110 | <0.0001 |
|                                                                                 | 5        | 0.100      | 4.5           | 90.9                   | 5 to 13          | 0.746            | 558.853  | 90  | <0.0001 |
|                                                                                 | 6        | 0.082      | 3.7           | 94.6                   | 6 to 13          | 0.821            | 377.146  | 72  | <0.0001 |
|                                                                                 | 7        | 0.047      | 2.1           | 96.7                   | 7 to 13          | 0.888            | 226.217  | 56  | <0.0001 |
|                                                                                 | 8        | 0.028      | 1.3           | 98.0                   | 8 to 13          | 0.930            | 138.254  | 42  | <0.0001 |
|                                                                                 | 9        | 0.019      | 0.9           | 98.8                   | 9 to 13          | 0.956            | 85.673   | 30  | <0.0001 |
|                                                                                 | 10       | 0.014      | 0.6           | 99.5                   | 10 to 13         | 0.975            | 48.997   | 20  | <0.0001 |
|                                                                                 | 11       | 0.009      | 0.4           | 99.9                   | 11 to 13         | 0.989            | 21.684   | 12  | 0.041   |
|                                                                                 | 12       | 0.002      | 0.1           | 100.0                  | 12 to 13         | 0.997            | 5.229    | 6   | 0.515   |
|                                                                                 | 13       | 0.000      | 0             | 100.0                  | 13               | 1.000            | 0.755    | 2   | 0.686   |
| DFA 3<br>(individual signature;<br>3 most common distress call syllables types) | 1        | 1.440      | 54.2          | 54.2                   | 1 to 13          | 0.138            | 3538.817 | 182 | <0.0001 |
|                                                                                 | 2        | 0.399      | 15.0          | 69.3                   | 2 to 13          | 0.336            | 1946.755 | 156 | <0.0001 |
|                                                                                 | 3        | 0.248      | 9.4           | 78.6                   | 3 to 13          | 0.470            | 1347.496 | 132 | <0.0001 |
|                                                                                 | 4        | 0.230      | 8.7           | 87.3                   | 4 to 13          | 0.587            | 951.356  | 110 | <0.0001 |
|                                                                                 | 5        | 0.113      | 4.3           | 91.5                   | 5 to 13          | 0.722            | 582.073  | 90  | <0.0001 |
|                                                                                 | 6        | 0.078      | 2.9           | 94.5                   | 6 to 13          | 0.804            | 390.515  | 72  | <0.0001 |
|                                                                                 | 7        | 0.058      | 2.2           | 96.7                   | 7 to 13          | 0.866            | 256.486  | 56  | <0.0001 |
|                                                                                 | 8        | 0.035      | 1.3           | 98.0                   | 8 to 13          | 0.916            | 155.655  | 42  | <0.0001 |
|                                                                                 | 9        | 0.028      | 1.0           | 99.0                   | 9 to 13          | 0.949            | 94.294   | 30  | <0.0001 |
|                                                                                 | 10       | 0.017      | 0.6           | 99.7                   | 10 to 13         | 0.975            | 45.771   | 20  | 0.001   |
|                                                                                 | 11       | 0.006      | 0.2           | 99.9                   | 11 to 13         | 0.991            | 15.877   | 12  | 0.197   |
|                                                                                 | 12       | 0.002      | 0.1           | 100.0                  | 12 to 13         | 0.997            | 5.562    | 6   | 0.474   |
|                                                                                 | 13       | 0.001      | 0.0           | 100.0                  | 13               | 0.999            | 1.211    | 2   | 0.546   |

**Reaction to Playbacks – Per-bat response in small captive groups**

The per-bat response of individuals housed in small groups was significant for playbacks of normal distress calls and distorted distress calls, but not for playbacks of heterospecific distress calls (permuted paired t-test, df = 19; normal:  $t = 4.5923$ ,  $P < 0.0002$ ; distorted:  $t = 3.0956$ ,  $P = 0.0042$ ; heterospecific:  $t = -0.28562$ ,  $P = 0.782$ ). The per-bat response of small captive groups can be directly compared to the response of single captive individuals which did not react significantly to our playbacks (permuted paired t-test, df = 9; normal:  $t = 0.16338$ ,  $P = 0.9088$ ; distorted:  $t = -1.2732$ ,  $P = 0.2964$ ; heterospecific:  $t = 0.9853$ ,  $P = 0.4718$ ).

## Hovering time in front of the speaker

We measured the hovering time of small captive groups and single captive individuals in front of the speaker in millisecond, using Media Player Classic (Gabest; version 1.7.17.1 from June 26<sup>st</sup>, 2018). We defined a hovering flight as the state in which the bat hovered stationary in front of the speaker without moving forward. We also filmed large free-living groups during our playbacks but could not interpret the videos in a meaningful way since too many bats were simultaneously circling the speaker and hovering in front of it.

Individuals in large free-living groups and small captive groups as well as single captive individuals occasionally hovered in front of the speaker. We did not conduct statistical tests for hovering time, since it was a rare event and our data was therefore strongly zero-inflated. Nevertheless, the duration of hovering flights was higher for individuals in small captive groups than for single captive individuals, which corresponds well with the observed response strength based on echolocation counts. However, it was not possible to measure hover duration for individuals in large free-living groups since too many bats approached the speaker simultaneously (Table S2).

**Table S2:** Hovering time in front of the speaker analysed through video analysis; Normal (conspecific distress call), Control 1 (distorted conspecific distress call) and Control 2 (heterospecific distress call).

| Playback |            |     |            |       | Stimulus-Donor |     | Order (pb1-3) |           |           | Hovering time in front of the speaker (mm:ss,sss) |           |           |
|----------|------------|-----|------------|-------|----------------|-----|---------------|-----------|-----------|---------------------------------------------------|-----------|-----------|
| Number   | Group size | Sex | Date       | Time  | ID             | Sex | Normal        | Control 1 | Control 2 | pb1                                               | pb2       | pb3       |
| 1        | 3          | M   | 18/03/2018 | 20:56 | Gsor_33_1      | M   | 1             | 3         | 2         | 00:00,000                                         | 00:00,000 | 00:00,000 |
| 2        | 3          | M   | 13/03/2018 | 19:26 | Gsor_69_1      | F   | 2             | 3         | 1         | 00:00,000                                         | 00:15,365 | 00:04,134 |
| 3        | 3          | M   | 14/03/2018 | 19:21 | Gsor_28        | M   | 2             | 1         | 3         | 00:00,000                                         | 00:00,000 | 00:00,000 |
| 4        | 3          | M   | 15/03/2018 | 19:25 | Gsor_55        | F   | 1             | 2         | 3         | 00:00,522                                         | 00:00,000 | 00:00,000 |
| 5        | 3          | M   | 20/03/2018 | 20:23 | Gsor_41        | M   | 3             | 1         | 2         | 00:00,000                                         | 00:00,000 | 00:02,138 |
| 6        | 3          | M   | 23/03/2018 | 20:37 | Gsor_27        | F   | 3             | 1         | 2         | 00:00,000                                         | 00:02,482 | 00:00,000 |
| 7        | 3          | M   | 24/03/2018 | 20:23 | Gsor_56        | M   | 3             | 1         | 2         | 00:00,000                                         | 00:00,000 | 00:00,000 |
| 8        | 3          | M   | 25/03/2018 | 20:31 | Gsor_86        | F   | 3             | 2         | 1         | 00:00,000                                         | 00:01,370 | 00:02,991 |
| 9        | 3          | M   | 26/03/2018 | 19:15 | Gsor_33_2      | M   | 1             | 2         | 3         | 00:00,000                                         | 00:04,197 | 00:00,000 |
| 10       | 3          | M   | 27/03/2018 | 20:25 | Gsor_69_2      | F   | 2             | 1         | 3         | 00:00,000                                         | 00:00,000 | 00:00,000 |
| 11       | 1          | M   | 31/03/2018 | 23:57 | Gsor_55        | F   | 2             | 1         | 3         | 00:02,295                                         | 00:00,000 | 00:00,000 |
| 12       | 1          | M   | 01/04/2018 | 00:27 | Gsor_41        | M   | 2             | 1         | 3         | 00:00,000                                         | 00:01,846 | 00:00,000 |
| 13       | 1          | M   | 31/03/2018 | 23:27 | Gsor_27        | F   | 3             | 1         | 2         | 00:00,000                                         | 00:00,000 | 00:00,000 |
| 14       | 1          | M   | 28/03/2018 | 23:27 | Gsor_56        | M   | 1             | 3         | 2         | 00:00,000                                         | 00:00,000 | 00:00,000 |
| 15       | 1          | M   | 28/03/2018 | 22:53 | Gsor_86        | F   | 1             | 2         | 3         | 00:00,000                                         | 00:00,000 | 00:00,000 |
| 16       | 3          | F   | 11/03/2018 | 20:15 | Gsor_69_2      | F   | 2             | 3         | 1         | 00:00,000                                         | 00:04,187 | 00:01,662 |
| 17       | 3          | F   | 12/03/2018 | 19:29 | Gsor_33_2      | M   | 2             | 1         | 3         | 00:13,654                                         | 00:01,421 | 00:00,000 |
| 18       | 3          | F   | 16/03/2018 | 19:28 | Gsor_86        | F   | 1             | 2         | 3         | 00:00,000                                         | 00:00,000 | 00:00,000 |
| 19       | 3          | F   | 17/03/2018 | 20:48 | Gsor_56        | M   | 3             | 2         | 1         | 00:00,000                                         | 00:00,000 | 00:00,000 |
| 20       | 3          | F   | 19/03/2018 | 20:31 | Gsor_27        | F   | 3             | 1         | 2         | 00:00,000                                         | 00:00,000 | 00:00,000 |
| 21       | 3          | F   | 21/03/2018 | 20:39 | Gsor_41        | M   | 3             | 1         | 2         | 00:00,000                                         | 00:00,000 | 00:03,364 |
| 22       | 3          | F   | 22/03/2018 | 20:41 | Gsor_55        | F   | 3             | 2         | 1         | 00:00,000                                         | 00:00,000 | 00:00,000 |
| 23       | 3          | F   | 29/03/2018 | 20:30 | Gsor_28        | M   | 1             | 2         | 3         | 00:03,667                                         | 00:00,000 | 00:00,000 |
| 24       | 3          | F   | 30/03/2018 | 20:56 | Gsor_69_1      | F   | 2             | 1         | 3         | 00:00,000                                         | 00:00,000 | 00:00,854 |
| 25       | 2          | F   | 01/04/2018 | 19:44 | Gsor_33_1      | M   | 2             | 3         | 1         | 00:00,000                                         | 00:00,000 | 00:00,000 |
| 26       | 1          | F   | 30/03/2018 | 21:52 | Gsor_56        | M   | 2             | 1         | 3         | 00:00,000                                         | 00:00,000 | 00:00,000 |
| 27       | 1          | F   | 29/03/2018 | 21:53 | Gsor_41        | M   | 1             | 3         | 2         | 00:00,000                                         | 00:00,000 | 00:00,000 |
| 28       | 1          | F   | 29/03/2018 | 21:23 | Gsor_55        | F   | 3             | 2         | 1         | 00:00,000                                         | 00:00,000 | 00:00,000 |
| 29       | 1          | F   | 22/03/2018 | 21:37 | Gsor_28        | M   | 1             | 2         | 3         | 00:00,000                                         | 00:00,000 | 00:00,000 |
| 30       | 1          | F   | 22/03/2018 | 22:14 | Gsor_69_1      | F   | 2             | 1         | 3         | 00:00,000                                         | 00:00,000 | 00:00,000 |

Bold numbers symbolize response to conspecific distress calls.

**Video S1:** Presumably active mobbing of a predator by *Glossophaga soricina*. Free-living group of bats in Costa Rica is approaching, circling and hovering in front of a common boa (*Boa constrictor*) which entered their day-roost.

### Playback Set-Up

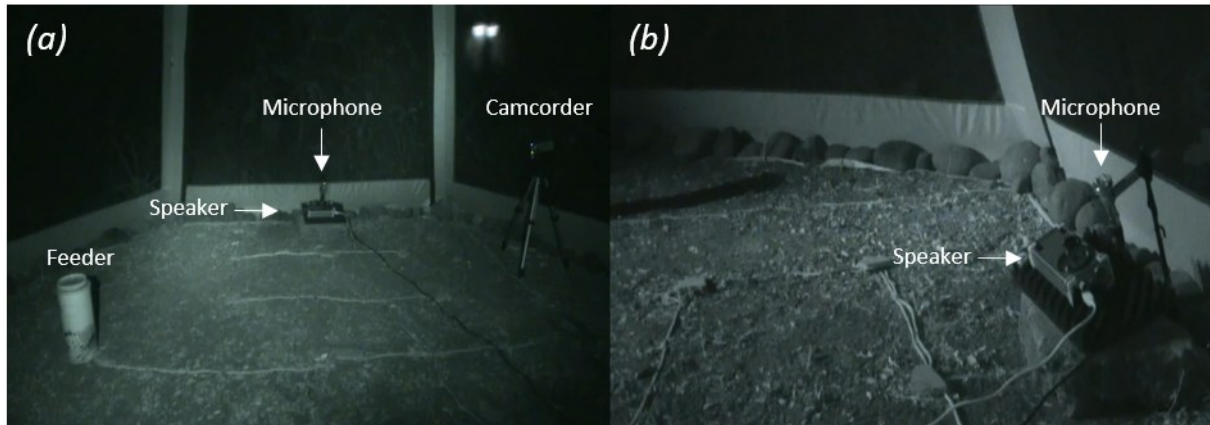

**Figure S2:** Playback set up: (a) view from the front camcorder (DCR-SR85, Sony, Japan), equipped with a wide angle conversion lens; two infrared emitters were positioned left and right from the camcorder; (b) the feeder was positioned on the left side view from the second camcorder; Avisoft USG Player BL Pro speaker and Avisoft CM16 microphone had the same inclination.
